# Supplementary material for: Atomically dispersed Pd on ZrO2 for efficient nitrite electroreduction to ammonia
Source: Royal Society of Chemistry journal article supplement (doi:10.1039/d4qi01609b), 2024-01-01
Supplement: d4qi01609b1.pdf [file d4qi01609b1.pdf]

# Supporting Information

## Atomically Dispersed Pd on ZrO<sub>2</sub> for Efficient Nitrite Electroreduction to Ammonia

Wenyu Du, Zeyi Sun, Chaofan Qiang, Kai Chen, Ke Chu\*

*School of Materials Science and Engineering, Lanzhou Jiaotong University, Lanzhou 730070,  
China.*

\*Corresponding author. [chuk630@mail.lzjtu.cn](mailto:chuk630@mail.lzjtu.cn) (K. Chu)

### ***Experimental section***

7.40 g of  $\text{ZrO}(\text{NO}_3)_2 \cdot x\text{H}_2\text{O}$  and 19.22 g of urea were dissolved in 80 mL of deionized water. And the mixed solution was transferred to a Teflon-lined stainless steel autoclave and kept under 160 °C for 20 h. After cooling, the precipitates were washed with deionized water several times and dried at 80 °C for 12 h. The dried precipitates were then calcined in a muffle furnace at 500 °C for 3 h to obtain  $\text{ZrO}_2$ . To prepare  $\text{Pd}_1/\text{ZrO}_2$ , an impregnation solution was used by dissolving 0.30 g of  $\text{PdCl}_2$  in 30 mL of deionized water. The as-prepared  $\text{ZrO}_2$  was then immersed in impregnation solution for 1 h, followed by drying under vacuum at 110 °C to obtain  $\text{Pd}_1/\text{ZrO}_2$ .

### ***Electrochemical experiments***

Electrochemical measurements were carried out on a CHI-760E electrochemical workstation using a three-electrode cell, with Ag/AgCl (saturated KCl), Pt foil and catalyst coated on carbon cloth (CC,  $1 \times 1 \text{ cm}^2$ ) as reference, counter and working electrodes, respectively. All potentials were referenced to reversible hydrogen electrode (RHE) in terms of  $E \text{ (V vs. RHE)} = E \text{ (V vs. Ag/AgCl)} + 0.198 \text{ V} + 0.059 \times \text{pH}$ . The CC substrate ( $1 \times 1 \text{ cm}^2$ ) was pretreated by soaking it in 0.5 M  $\text{H}_2\text{SO}_4$  for 12 h, and then washed with deionized water several times and dried at 60 °C for 24 h. The catalyst ink was prepared by dispersing 1 mg of the catalysts in 100  $\mu\text{L}$  of ethyl alcohol containing 5  $\mu\text{L}$  of Nafion (5 wt%) under ultrasonication. The catalyst inks were dropped onto CC ( $0.2 \text{ mg} \cdot \text{cm}^{-2}$ ) to form the working electrodes. The electrochemical  $\text{NO}_2\text{RR}$  measurements were performed 0.5 M  $\text{Na}_2\text{SO}_4$  solution containing 0.1 M  $\text{NaNO}_2$  using an H-type electrochemical cell separated by a Nafion 211 membrane. After each chronoamperometry test at certain potential for 1 h, the liquid products were analyzed by various colorimetric methods using UV-vis absorbance spectrophotometer (MAPADA P5), while the gas products ( $\text{H}_2$ ,  $\text{N}_2$ ) were analyzed by gas chromatography (Shimadzu GC2010).

### ***Determination of $\text{NH}_3$***

The generated  $\text{NH}_3$  was determined by the indophenol blue method<sup>1</sup>. Typically, 0.5 mL of electrolyte was removed from the electrochemical reaction vessel and

diluted 50 times with deionized water. Then 2 mL of diluted solution was removed into a clean vessel followed by sequentially adding NaOH solution (2 mL, 1 M) containing C<sub>7</sub>H<sub>6</sub>O<sub>3</sub> (5 wt.%) and C<sub>6</sub>H<sub>5</sub>Na<sub>3</sub>O<sub>7</sub> (5 wt.%), NaClO (1 mL, 0.05 M), and Na<sub>2</sub>Fe(CN)<sub>5</sub>NO·2H<sub>2</sub>O (0.2 mL, 1wt.%) aqueous solution. After the incubation for 2 h at room temperature, the mixed solution was subjected to UV-vis measurement using the absorbance at 655 nm wavelength. The concentration-absorbance curves were calibrated by the standard NH<sub>4</sub>Cl solution with a series of concentrations<sup>2,3</sup>.

### ***Calculations of NH<sub>3</sub> yield rate and NH<sub>3</sub>-Faradaic efficiency***

$$NH_3 \text{ yield rate } (\mu \cdot h^{-1} \cdot mg_{cat}^{-1}) = \frac{C_{NH_3} \times V}{t \times A} \quad (1)$$

$$NH_3 - \text{Faradaic efficiency}(\%) = \frac{6 \times F \times C_{NH_3} \times V}{17 \times Q} \times 100\% \quad (2)$$

where  $c_{NH_3}$  ( $\mu\text{g mL}^{-1}$ ) is the measured NH<sub>3</sub> concentration,  $V$  (mL) is the volume of the electrolyte,  $t$  (h) is the reduction time,  $A$  ( $\text{cm}^2$ ) is the surface area of CC ( $1 \times 1 \text{ cm}^2$ ),  $F$  ( $96500 \text{ C mol}^{-1}$ ) is the Faraday constant,  $Q$  (C) is the quantity of applied electricity.

### ***Characterizations***

X-ray diffraction (XRD) pattern was collected on a Rigaku D/max 2400 diffractometer. X-ray photoelectron spectroscopy (XPS) analysis was conducted on a PHI 5702 spectrometer. Transmission electron microscopy (TEM) and high-resolution transmission electron microscopy (HRTEM) were recorded on a Tecnai G2 F20 microscope. Spherical aberration-corrected scanning transmission electron microscopy (AC-STEM) was performed on a Titan Cubed Themis G<sup>2</sup> 300 microscope. Online differential electrochemical mass spectrometry (DEMS, QAS 100) was performed by QAS 100 spectrometer. Various products during the electrolysis reactions were monitored at different values of  $m/z$  ionic signals.

### ***Calculation details***

Cambridge sequential total energy package (CASTEP) module was employed for the density functional theory (DFT) calculations<sup>4</sup>. Electron-exchange correlations were represented by the functional of Perdew-Burke-Ernzerhof (PBE) of the generalized gradient approximation (GGA). The van der Waals interactions were

evaluated by employing the Grimme (DFT+D) scheme. The convergence criteria for structure optimization were set to: (1) energy tolerance of  $1 \times 10^{-5}$  eV, (2) maximum force tolerance of  $0.02$  eV  $\text{\AA}^{-1}$ , (3) Monkhorst-Pack k-point sampling:  $2 \times 2 \times 1$ . The cutoff energy for the plane wave basis was set at  $420$  eV. Monoclinic  $\text{ZrO}_2$  (-111) was modeled by a  $3 \times 3$  supercell, and a vacuum region of  $15$   $\text{\AA}$  was used to separate adjacent slabs.

The free energies ( $\Delta G$ , 298 K) for each reaction were given after correction<sup>5</sup>:

$$\Delta G = \Delta E + \Delta ZPE - T\Delta S \quad (3)$$

where  $\Delta E$  is the adsorption energy,  $\Delta ZPE$  is the zero-point energy difference and  $T\Delta S$  is the entropy difference between the gas phase and adsorbed state.

The Forcite module was employed for the MD simulations<sup>6</sup>. The electrolyte system was modeled by a cubic cell with placing catalyst at the center of the cell and randomly filling 1000  $\text{H}_2\text{O}$ , 50 NO molecules, and 50 H atoms. The force field type was chosen as universal. After geometry optimization, the MD simulations were carried out with the total simulation time of 1 ns at a time step of 1 fs. The radial distribution function (RDF) is calculated by<sup>7</sup>:

$$g(r) = \frac{dN}{4\pi\rho r^2 dr} \quad (4)$$

where  $dN$  is the amount of  $\text{NO}_2^-$  in the shell between the central particle  $r$  and  $r+dr$ ,  $\rho$  is the number density of  $\text{NO}_2^-$  and H.

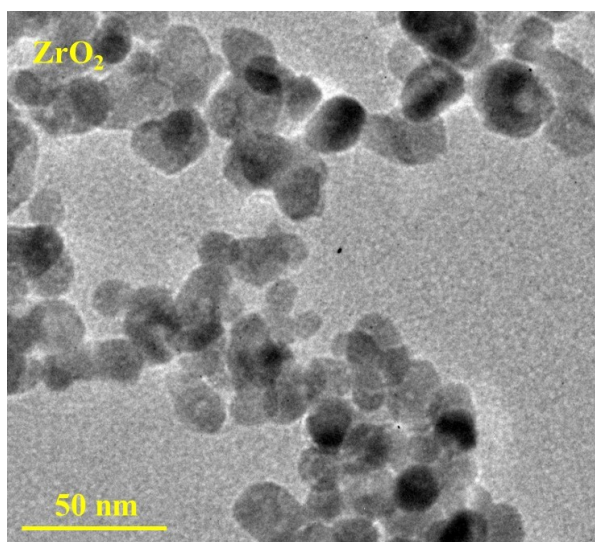

Figure S1. TEM image of ZrO<sub>2</sub>.

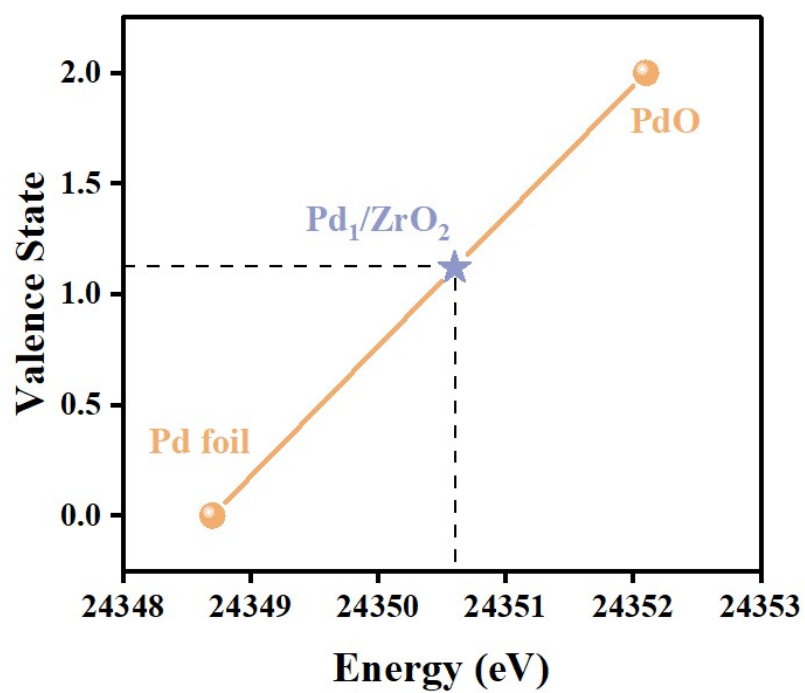

Figure S2. XANES fitted curve to determine the average Pd valence state of Pd<sub>1</sub>/ZrO<sub>2</sub>.

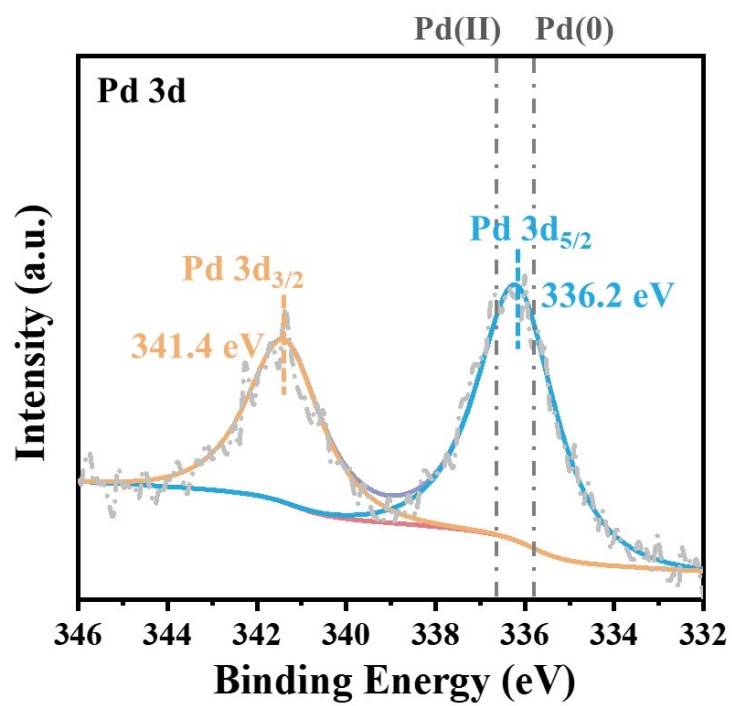

Figure S3. XPS Pd 3d spectra of Pd<sub>1</sub>/ZrO<sub>2</sub>.

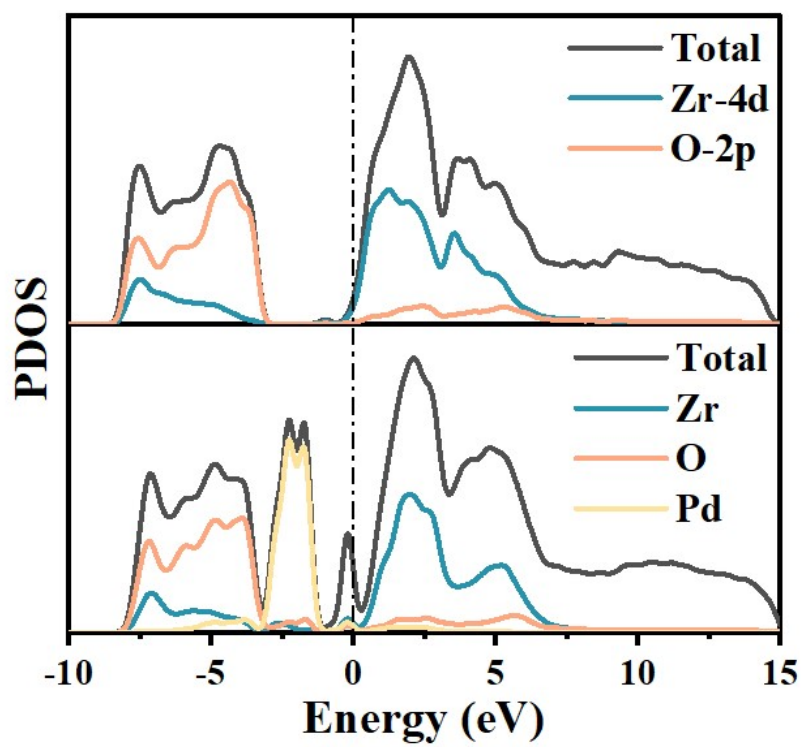

Figure S4. PDOS profiles of  $\text{ZrO}_2$  and  $\text{Pd}_1/\text{ZrO}_2$ .



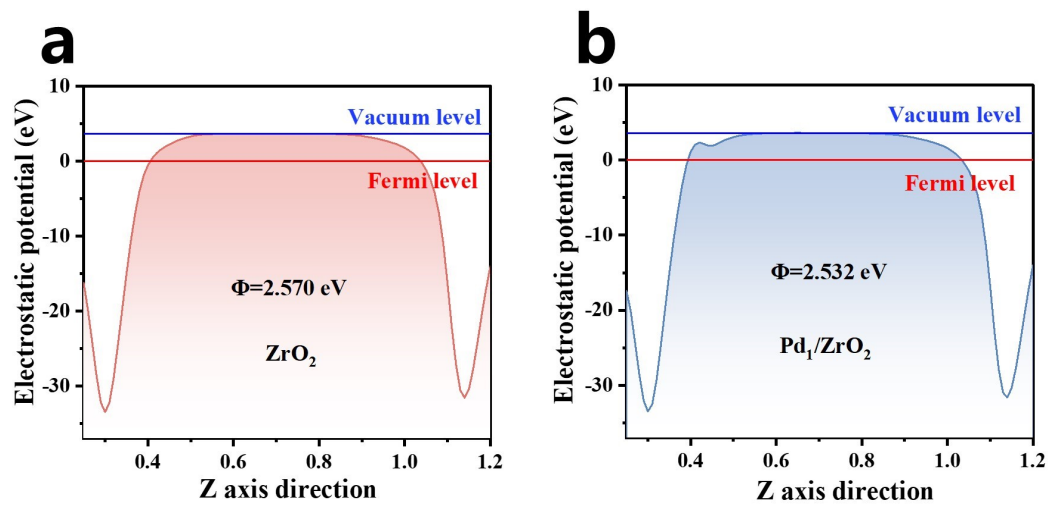

Figure S5. Average potential profiles along c-axis direction for calculating the work functions ( $\Phi$ ) of (a) ZrO<sub>2</sub> and (b) Pd<sub>1</sub>/ZrO<sub>2</sub>.

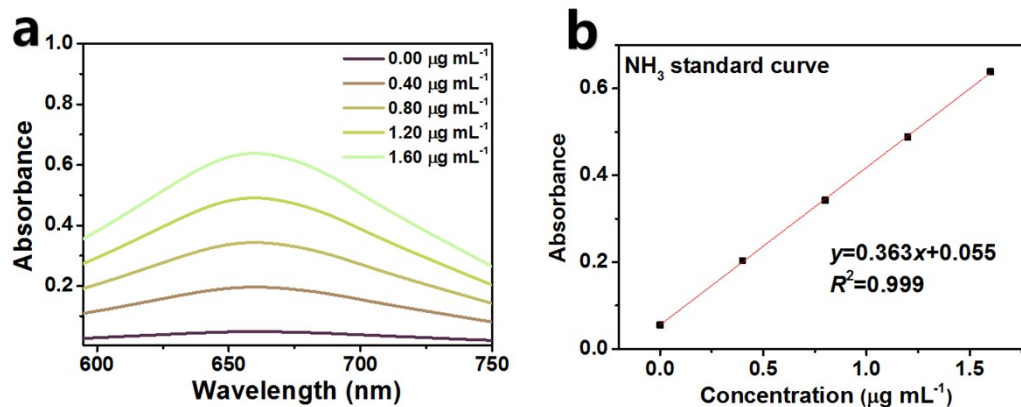

Figure S6. UV-vis absorption spectra of  $\text{NH}_4^+$  assays after incubated for 2 h at ambient conditions. (b) Calibration curve used for the calculation of  $\text{NH}_3$  concentrations.

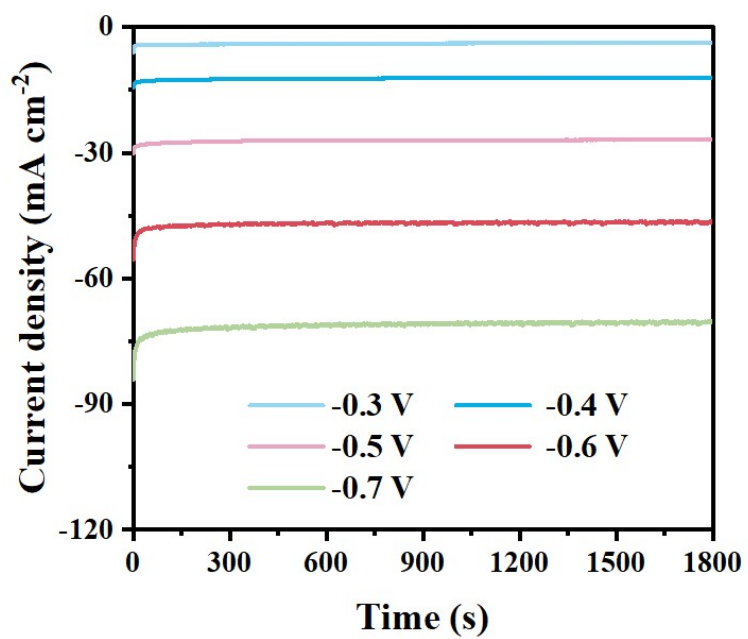

Figure S7. Chronoamperometry test of ZrO<sub>2</sub> in H cell.

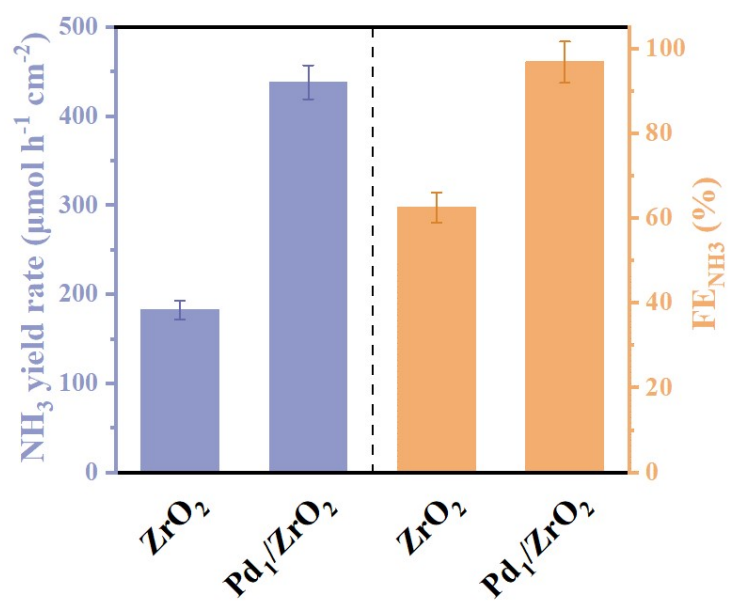

Figure S8. Comparison of NO<sub>2</sub>RR performance between ZrO<sub>2</sub> and Pd<sub>1</sub>/ZrO<sub>2</sub>.

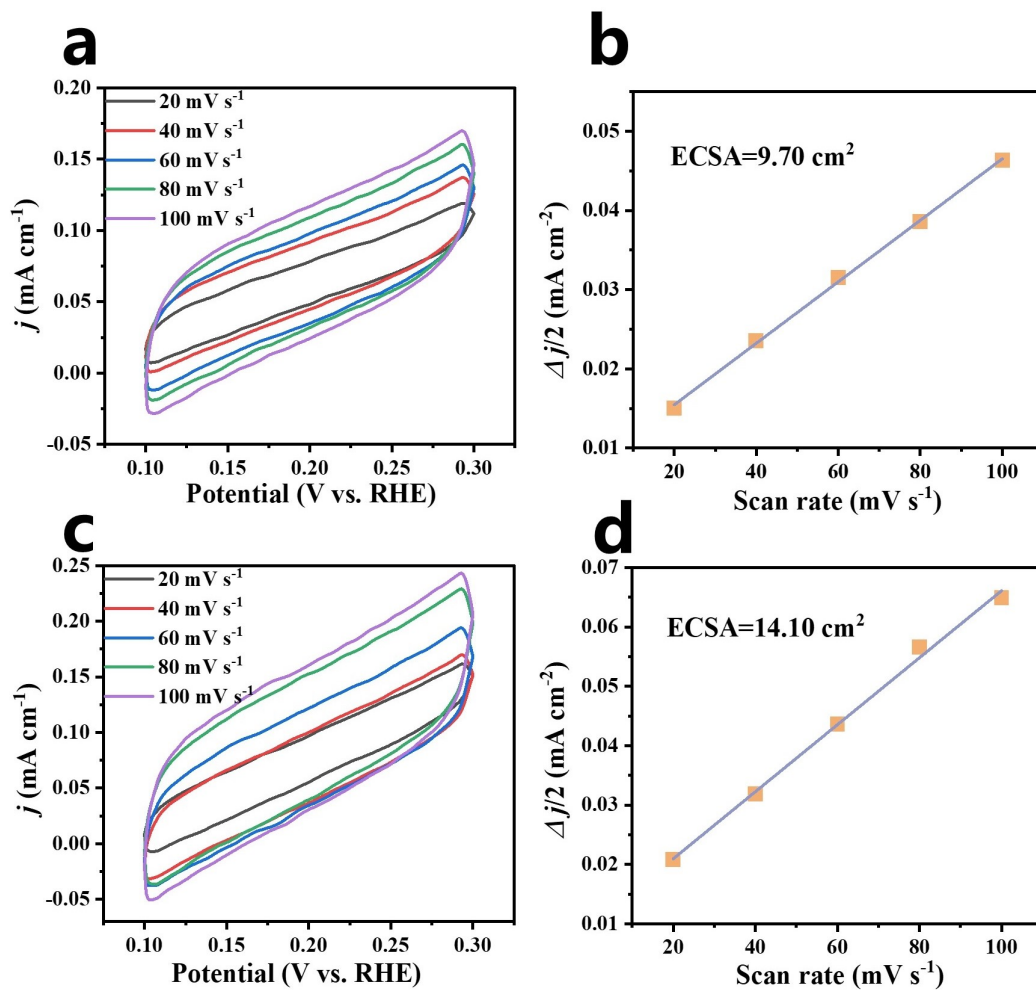

Figure S9. CV measurements at different scanning rates and calculated electrochemically active surface area (ECSA) for (a, b)  $\text{ZrO}_2$ , (c, d)  $\text{Pd}_1/\text{ZrO}_2$ .

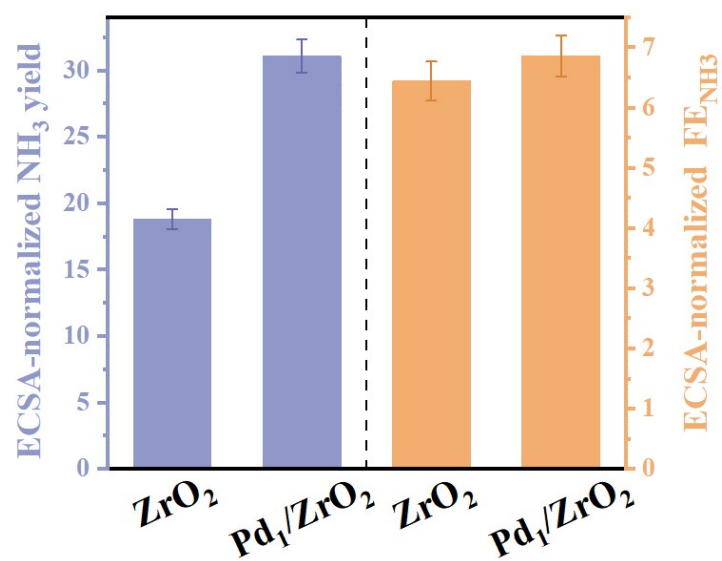

Figure S10. ECSA-normalized NH<sub>3</sub> yield rate and FE<sub>NH3</sub> of ZrO<sub>2</sub> and Pd<sub>1</sub>/ZrO<sub>2</sub> at -0.6 V.

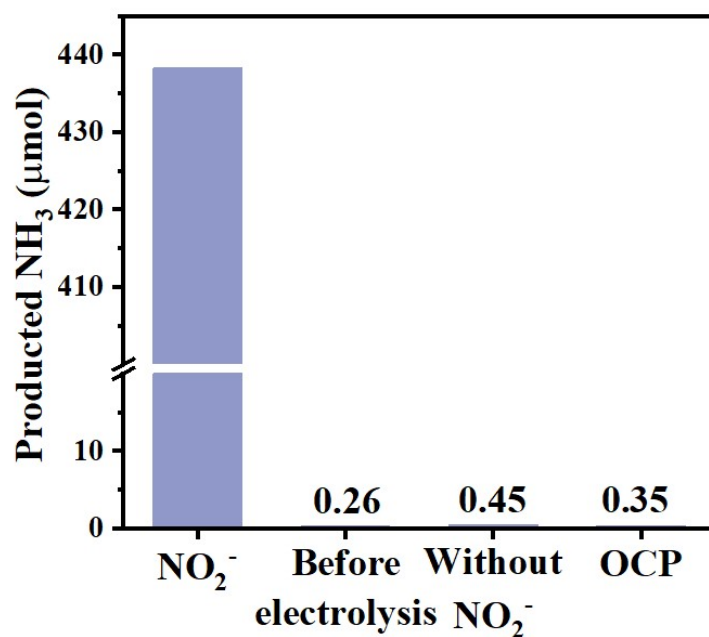

Figure S11. Amounts of produced NH<sub>3</sub> on Pd<sub>1</sub>/ZrO<sub>2</sub> under different conditions: (1) electrolysis in NO<sub>2</sub><sup>-</sup>-containing solution at -0.6 V, (2) before electrolysis, (3) electrolysis in NO<sub>2</sub><sup>-</sup>-free solution at -0.6 V; (4) electrolysis in NO<sub>2</sub><sup>-</sup>-containing solution at open-circuit potential (OCP).

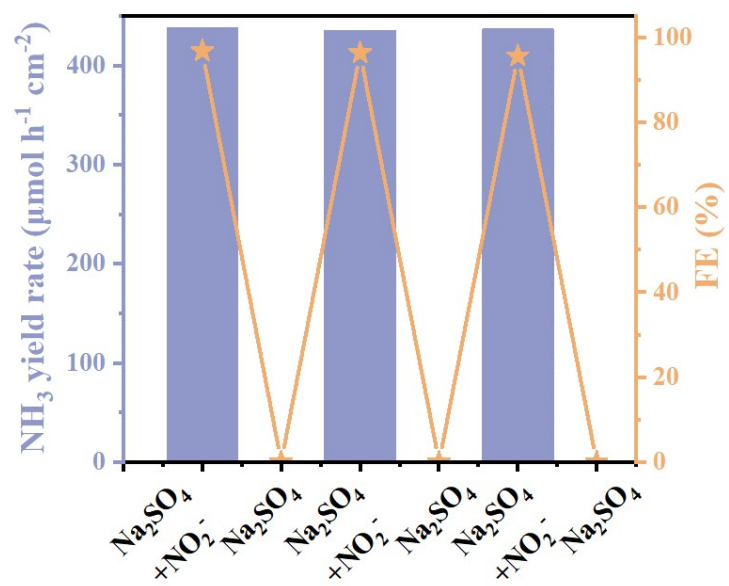

Figure S12. Alternating cycling test on Pd<sub>1</sub>/ZrO<sub>2</sub> with/without NO<sub>2</sub><sup>-</sup> at -0.6 V.



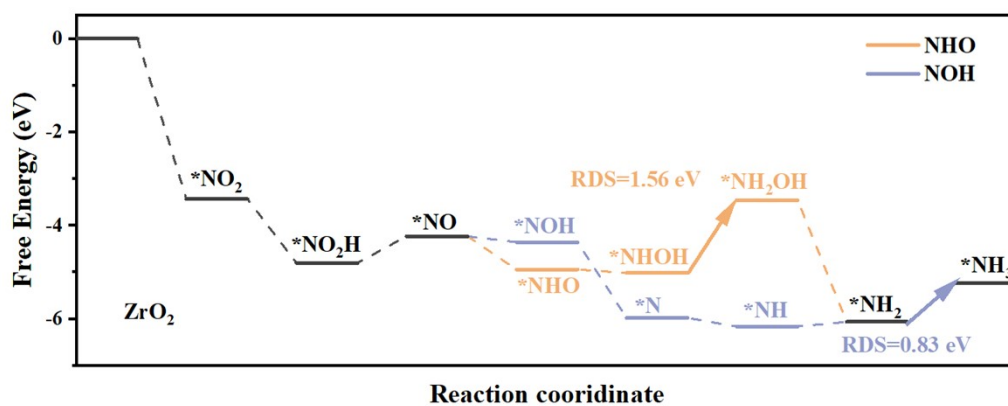

Figure S13. Free energy diagrams of various NO<sub>2</sub>RR pathways (NHO/NOH) on ZrO<sub>2</sub>.

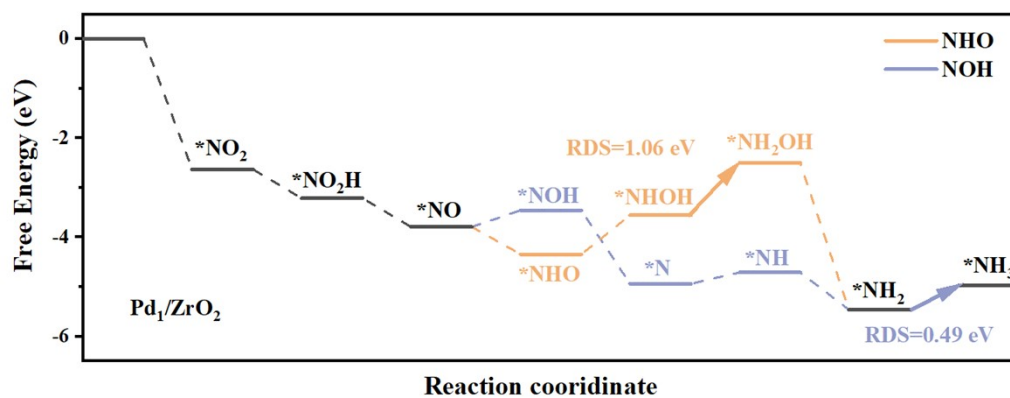

Figure S14. Free energy diagrams of various NO<sub>2</sub>RR pathways (NHO/NOH) on Pd<sub>1</sub>/ZrO<sub>2</sub>.

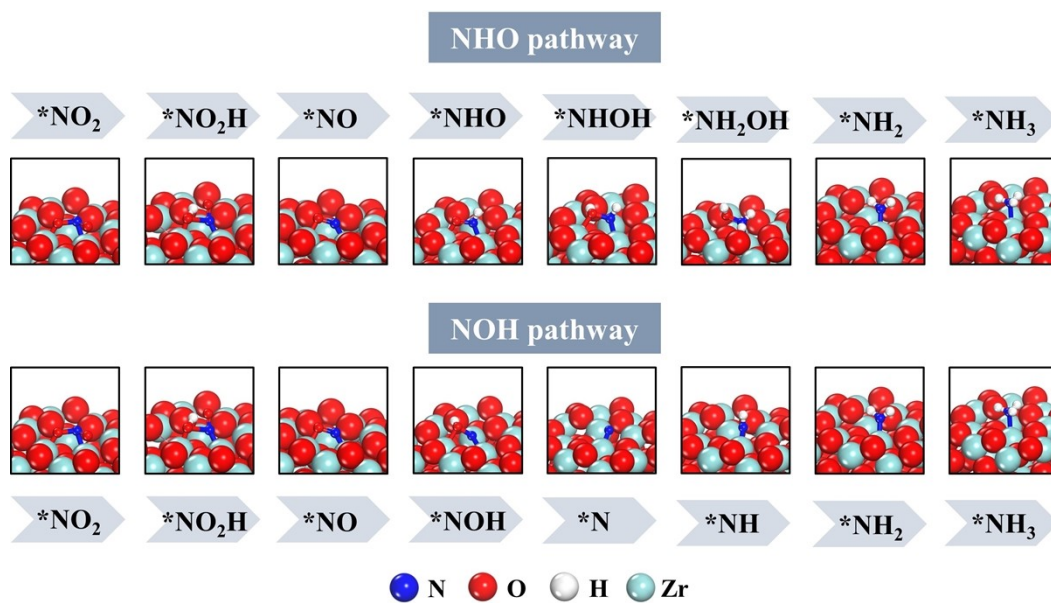

Figure S15. Optimized structures of the reaction intermediates involved in NHO/NOH pathways on ZrO<sub>2</sub>.

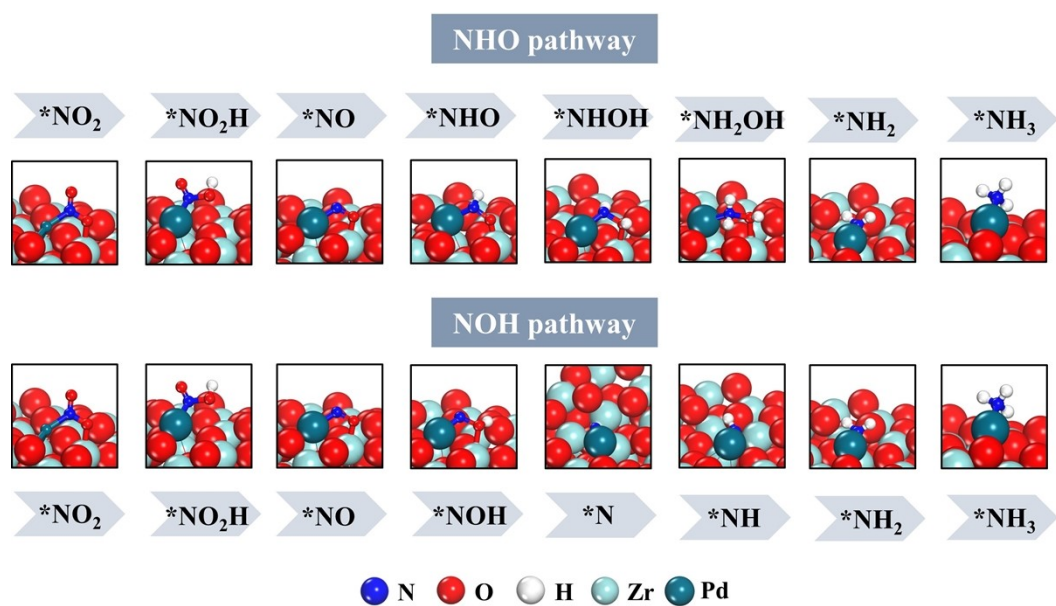

Figure S16. Optimized structures of the reaction intermediates involved in NHO/NOH pathways on Pd<sub>1</sub>/ZrO<sub>2</sub>.

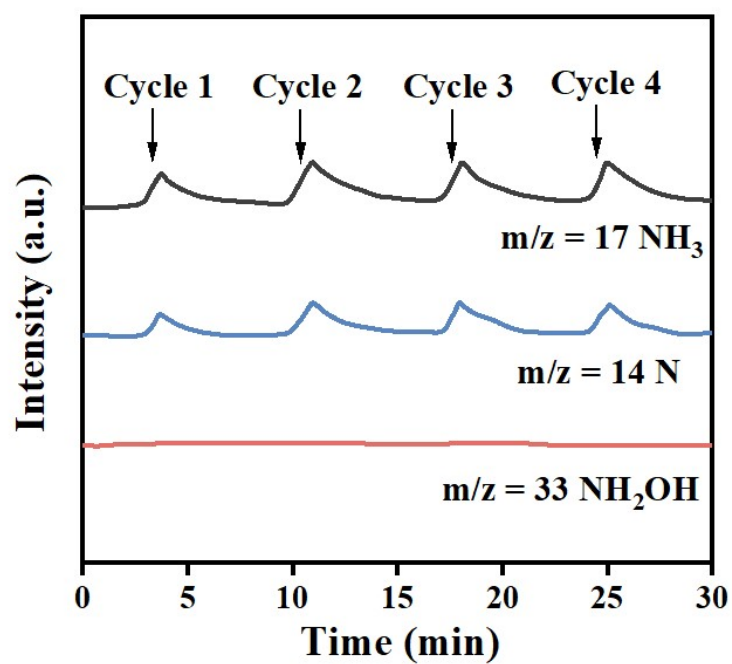

Figure S17. Online DEMS spectra of ZrO<sub>2</sub> during NO<sub>2</sub>RR electrolysis at -0.6 V.

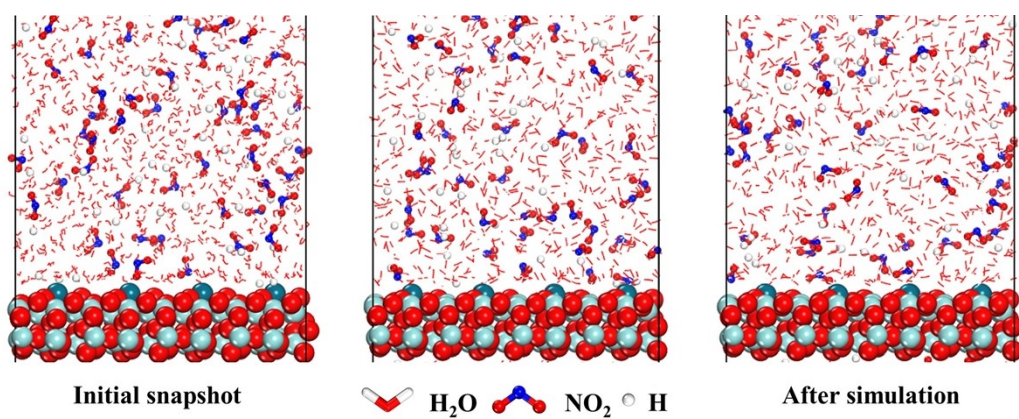

Figure S18.  $^*\text{NO}_2/^*\text{H}$  snapshots of  $\text{Pd}_1/\text{ZrO}_2$  before and after simulation.

Table S1. Pd K-edge EXAFS fitting results of Pd<sub>1</sub>/ZrO<sub>2</sub>.

| Sample                            | Shell | CN   | R (Å) | $\sigma^2$ (10 <sup>-3</sup> Å) | $ \Delta E_0 $ (eV) | R factor |
|-----------------------------------|-------|------|-------|---------------------------------|---------------------|----------|
| Pd <sub>1</sub> /ZrO <sub>2</sub> | Pd-O  | 1.25 | 2.01  | 6.1                             | 4.9                 | 0.12     |
|                                   | Pd-Zr | 1.17 | 2.78  |                                 |                     |          |

CN is the coordination number, R is interatomic distance,  $\sigma^2$  is Debye-Waller factor,  $\Delta E_0$  is edge-energy shift, R factor is used to value the goodness of the fitting.

Table S2. Comparison of the optimum NH<sub>3</sub> yield and FE<sub>NH3</sub> for the recently reported state of the art NO<sub>2</sub>RR electrocatalysts at ambient conditions.

| Catalyst                              | Electrolyte                                                                  | NH <sub>3</sub> yield rate (μmol h <sup>-1</sup> cm <sup>-2</sup> ) | FE <sub>NH3</sub> (%) | Potential (V vs RHE) | Ref              |
|---------------------------------------|------------------------------------------------------------------------------|---------------------------------------------------------------------|-----------------------|----------------------|------------------|
| P-TiO <sub>2</sub> /TP                | 0.1 M Na <sub>2</sub> SO <sub>4</sub> (0.1 M NO <sub>2</sub> <sup>-</sup> )  | 560.8                                                               | 90.6                  | -0.6 V               | 8                |
| Cu <sub>3</sub> P NA/CF               | 0.1 M PBS (0.1 M NaNO <sub>2</sub> )                                         | 95.7±2.1                                                            | 91.2±2.5              | -0.5 V               | 9                |
| Ag@NiO/CC                             | 0.1 M NaOH (0.1 M NaO <sub>2</sub> )                                         | 338.3                                                               | 96.1                  | -0.7 V               | 10               |
| CoP NA/TM                             | 0.1 M PBS (500 ppm NO <sub>2</sub> <sup>-</sup> )                            | 132.7±3.0                                                           | 90.0±2.3              | -0.2 V               | 11               |
| ITO@TiO <sub>2</sub> /TP              | 0.5 M LiClO <sub>4</sub> (0.1 M NO <sub>2</sub> )                            | 411.3                                                               | 82.6                  | -0.5 V               | 12               |
| Pd/CuO NOs                            | 0.1 M K <sub>2</sub> SO <sub>4</sub> (0.01 M KNO <sub>2</sub> )              | 53.3                                                                | 91.8                  | -1.5 V               | 13               |
| Ni@MDC                                | 0.1 M NaOH (0.1 M NO <sub>2</sub> <sup>-</sup> )                             | 300                                                                 | 65.4                  | -0.8 V               | 14               |
| CF@Cu <sub>2</sub> O                  | 0.1 M PBS (0.1 M NaNO <sub>2</sub> )                                         | 441.8                                                               | 94.2                  | -0.6 V               | 15               |
| Ni-TiO <sub>2</sub> /TP               | 0.1 M NaOH (0.1 M NO <sub>2</sub> <sup>-</sup> )                             | 380.27                                                              | 94.89                 | -0.5 V               | 16               |
| <b>Pd<sub>1</sub>/ZrO<sub>2</sub></b> | <b>0.1 M Na<sub>2</sub>SO<sub>4</sub> (0.1 M NO<sub>2</sub><sup>-</sup>)</b> | <b>438.06</b>                                                       | <b>96.75</b>          | <b>-0.6 V</b>        | <b>This Work</b> |



## References

1. D. Zhu, L. Zhang, R. E. Ruther and R. J. Hamers, Photo-illuminated diamond as a solid-state source of solvated electrons in water for nitrogen reduction, *Nat. Mater.*, 2013, **12**, 836.
2. G. W. WATT and J. D. CHRISP, A spectrophotometric method for the determination of hydrazine, *Anal. Chem.*, 1952, **24**, 2006-2008.
3. P. Li, Z. Jin, Z. Fang and G. Yu, A single-site iron catalyst with preoccupied active centers that achieves selective ammonia electrosynthesis from nitrate, *Energy Environ. Sci.*, 2021, **14**, 3522-3531.
4. S. J. Clark\*, M. D. SegallII, C. J. PickardII, P. J. HasnipIII, M. I. J. ProbertIV, K. RefsonV and M. C. PayneII, First principles methods using CASTEP, *Z. Kristallogr.-Cryst. Mater.*, 2005, **220**, 567-570.
5. J. Wang, J. Liang, P. Liu, Z. Yan, L. Cui, L. Yue, L. Zhang, Y. Ren, T. Li, Y. Luo, Q. Liu, X.-E. Zhao, N. Li, B. Tang, Y. Liu, S. Gao, A. M. Asiri, H. Hao, R. Gao and X. Sun, Biomass Juncus derived carbon decorated with cobalt nanoparticles enables high-efficiency ammonia electrosynthesis by nitrite reduction, *J. Mater. Chem. A*, 2022, **10**, 2842-2848.
6. K. Chu, Y. Luo, P. Shen, X. Li, Q. Li and Y. Guo, Unveiling the synergy of O-vacancy and heterostructure over MoO<sub>3-x</sub>/MXene for N<sub>2</sub> electroreduction to NH<sub>3</sub>, *Adv. Energy Mater.*, 2021, **12**, 2103022.
7. X. Li, P. Shen, X. Li, D. Ma and K. Chu, Sub-nm RuO<sub>x</sub> clusters on Pd metallene for synergistically enhanced nitrate electroreduction to ammonia, *ACS Nano*, 2023, **17**, 1081-1090.
8. L. Ouyang, X. He, S. Sun, Y. Luo, D. Zheng, J. Chen, Y. Li, Y. Lin, Q. Liu, A. M. Asiri and X. Sun, Enhanced electrocatalytic nitrite reduction to ammonia over P-doped TiO<sub>2</sub> nanobelt array, *J. Mater. Chem. A*, 2022, **10**, 23494-23498.
9. J. Liang, B. Deng, Q. Liu, G. Wen, Q. Liu, T. Li, Y. Luo, A. A. Alshehri, K. A. Alzahrani, D. Ma and X. Sun, High-efficiency electrochemical nitrite reduction to ammonium using a Cu<sub>3</sub>P nanowire array under ambient conditions, *Green Chem.*, 2021, **23**, 5487-5493.
10. Q. Liu, G. Wen, D. Zhao, L. Xie, S. Sun, L. Zhang, Y. Luo, A. Ali Alshehri, M. S. Hamdy, Q. Kong and X. Sun, Nitrite reduction over Ag nanoarray electrocatalyst for ammonia synthesis, *J. Colloid Interface Sci.*, 2022, **623**, 513-519.
11. G. Wen, J. Liang, Q. Liu, T. Li, X. An, F. Zhang, A. A. Alshehri, K. A. Alzahrani, Y. Luo, Q. Kong and X. Sun, Ambient ammonia production via electrocatalytic nitrite reduction catalyzed by a CoP nanoarray, *Nano Res.*, 2022, **15**, 972-977.
12. S. Li, J. Liang, P. Wei, Q. Liu, L. Xie, Y. Luo and X. Sun, ITO@TiO<sub>2</sub> nanoarray: An efficient and robust nitrite reduction reaction electrocatalyst toward NH<sub>3</sub> production under ambient conditions, *eScience*, 2022, **2**, 382-388.
13. S. Liu, L. Cui, S. Yin, H. Ren, Z. Wang, Y. Xu, X. Li, L. Wang and H. Wang, Heterointerface-triggered electronic structure reformation: Pd/CuO nano-olives motivate nitrite electroreduction to ammonia, *Appl. Catal. B*, 2022, **319**, 121876.
14. X. He, X. Li, X. Fan, J. Li, D. Zhao, L. Zhang, S. Sun, Y. Luo, D. Zheng, L. Xie, A. M. Asiri, Q. Liu and X. Sun, Ambient electroreduction of nitrite to ammonia over Ni nanoparticle supported on molasses-derived carbon sheets, *ACS Appl. Nano Mater.*, 2022, **5**, 14246-14250.
15. Q. Chen, X. An, Q. Liu, X. Wu, L. Xie, J. Zhang, W. Yao, M. S. Hamdy, Q. Kong and X. Sun, Boosting electrochemical nitrite-ammonia conversion properties by a Cu foam@Cu<sub>2</sub>O catalyst, *Chem. Commun.*, 2022, **58**, 517-520.

16. Z. Cai, C. Ma, D. Zhao, X. Fan, R. Li, L. Zhang, J. Li, X. He, Y. Luo, D. Zheng, Y. Wang, B. Ying, S. Sun, J. Xu, Q. Lu and X. Sun, Ni doping enabled improvement in electrocatalytic nitrite-to-ammonia conversion over TiO<sub>2</sub> nanoribbon, *Mater. Today Energy*, 2023, **31**, 101220.
